# Supplementary material for: Multi-electron/ion conduction channels enabling high-performance flexible supercapacitors
Source: Royal Society of Chemistry journal article supplement (doi:10.1039/d2ta06580k), 2022-01-01
Supplement: d2ta06580k4.pdf [file d2ta06580k4.pdf]

## Supporting Information

### **Multi-electron/ion conduction channels enabling high-performance flexible supercapacitors**

Fan Zeng,<sup>a</sup> Xianyin Song,<sup>\*a</sup> Jing Liang,<sup>b</sup> Xingang Zhang,<sup>ac</sup> Xuefeng Sha,<sup>a</sup> Xueli Wu,<sup>a</sup>  
Hongtao Zhou,<sup>a</sup> Zhi Liu,<sup>c</sup> Wei Wu,<sup>\*b</sup> and Changzhong Jiang<sup>\*a</sup>

<sup>a</sup> College of Materials Science and Engineering, Hunan University, Changsha 410082, China. E-mail: songxy@hnu.edu.cn, czjiang@hnu.edu.cn

<sup>b</sup> Laboratory of Printable Functional Materials and Printed Electronics, School of Printing and Packaging, Wuhan University, Wuhan 430072, China. E-mail: weiwu@whu.edu.cn

<sup>c</sup> Key Laboratory of Low-Dimensional Quantum Structures and Quantum Control of Ministry of Education, Key Laboratory for Matter Microstructure and Function of Hunan Province, Department of Physics and Synergetic Innovation Center for Quantum Effects and Applications, Hunan Normal University, Changsha 410081, China.

## Experimental Section

### *Materials*

Nickel nitrate hexahydrate ( $\text{Ni}(\text{NO}_3)_2 \cdot 6\text{H}_2\text{O}$ ), N-methylpyrrolidone (NMP), potassium hydroxide (KOH), Iron nitrate nonahydrate ( $\text{Fe}(\text{NO}_3)_3 \cdot 9\text{H}_2\text{O}$ ), and acetylene black are purchased from Sinopharm Chemical Reagent Co. Ltd. Polyvinylidene fluoride (PVDF, HSV900) is manufactured by Arkema Kynar. Graphene powders are purchased from Shanghai Aladdin Biochemical Technology Co. Ltd. Degreasing cotton is purchased from Nanchang Chaoyang Medical and Health Products Co., Ltd. LA133 binder, acetylene black and silver paste are purchased as the binder, conductive additives, and current collector, respectively.

### *Preparation of $\text{Fe}_2\text{O}_3/\text{CF}$ , $\text{NiO}/\text{CF}$ and $\text{Fe}_2\text{O}_3/\text{CF}@Gs$ , $\text{NiO}/\text{CF}@Gs$ inks*

3D hierarchical porous carbon fibers (CF) were prepared by high-temperature carbonization of degreasing cotton at 1000 °C for 2 hours under argon atmosphere. After cooling to room temperature, the obtained CF were grinded and immersed into certain concentration of  $\text{Fe}(\text{NO}_3)_3$  or  $\text{Ni}(\text{NO}_3)_2$  solution and stirring intensively. Then, after centrifugation and drying, the  $\text{Fe}_2\text{O}_3/\text{CF}$  is fabricated by annealing the intermediate  $\text{Fe}(\text{NO}_3)_3/\text{CF}$  powders at 450 °C for 1 hour under an argon protective atmosphere following the chemical equation of  $4\text{Fe}(\text{NO}_3)_3 \rightarrow 2\text{Fe}_2\text{O}_3 + 12\text{NO}_2\uparrow + 3\text{O}_2\uparrow$ , and  $\text{NiO}/\text{CF}$  is obtained at the same condition following the chemical equation of  $2\text{Ni}(\text{NO}_3)_2 \rightarrow 2\text{NiO} + 4\text{NO}_2\uparrow + \text{O}_2\uparrow$ . The other composite electrodes, like  $\text{Co}_3\text{O}_4/\text{CF}$ ,  $\text{MnO}_2/\text{CF}$  and  $\text{MoO}_3/\text{CF}$ , were fabricated by the same procedure. Pure NiO,  $\text{Fe}_2\text{O}_3$ ,  $\text{Co}_3\text{O}_4$ ,  $\text{MnO}_2$  and  $\text{MoO}_3$  samples were obtained by direct heat treatment of the

corresponding inorganic metal salts at the same temperatures. The composition of Fe<sub>2</sub>O<sub>3</sub>/CF@Gs (NiO/CF@Gs) inks included the Fe<sub>2</sub>O<sub>3</sub>/CF (NiO/CF), LA133 binder, acetylene black and graphene sheets (Gs), which were dispersed into deionized (DI) water under the mass ratio of 7 : 1 : 1 : 1. In the prepared of ink, the solid content of Fe<sub>2</sub>O<sub>3</sub>/CF@Gs (NiO/CF@Gs) material was ca. 22 wt%. The Fe<sub>2</sub>O<sub>3</sub> (NiO) and Fe<sub>2</sub>O<sub>3</sub>/CF (NiO/CF) ink is formed by the same procedures without graphene. And the composition of Fe<sub>2</sub>O<sub>3</sub>/CF (NiO/CF, Fe<sub>2</sub>O<sub>3</sub> and NiO) ink includes the Fe<sub>2</sub>O<sub>3</sub>/CF (NiO/CF, Fe<sub>2</sub>O<sub>3</sub> and NiO) powder, acetylene black and LA133 binder, which were mixed in distilled water according the weight ratio of 75 : 15 : 10 based on our previous works.<sup>1-3</sup>

### ***Fabrication of flexible supercapacitor***

The customized flexible electrodes are manufactured by screen-printing method (200 mesh printing plate). Firstly, the silver pastes were printed on the PET flexible substrates and dried at 70 °C for 30 minutes. And then the Fe<sub>2</sub>O<sub>3</sub>/CF@Gs (NiO/CF@Gs) inks were overprinted on the silver layer at the squeegee speed of 2 cm s<sup>-1</sup>. After dried at 70 °C for 30 minutes, the printed electrodes based on NiO/CF@Gs as positive and Fe<sub>2</sub>O<sub>3</sub>/CF@Gs as negative were prepared. The loading mass of dry reactive inks was 6~8 mg/cm<sup>2</sup> (Figure S9). Meanwhile, 4.0 g PVA and 2.4 g KOH were dissolved in 40 mL deionized water and stirred at 80 °C until the mixture became a clear solution to prepare the KOH/PVA gel electrolyte. Finally, KOH/PVA gel electrolytes were coated on the active electrode and a cellulose membrane was placed between the two electrodes to assemble a flexible supercapacitor.

### ***Electrochemical test***

Cyclic voltammetry (CV), galvanostatic charge/discharge (GCD), and electrochemical impedance spectroscopy (EIS) were collected on a CHI 760E electrochemical working station. In the three electrodes test, a Pt filament served as the counter electrode and Hg/HgO was used as the reference electrode in 6 M KOH, and the working electrode is fabricated by followed procedure. Firstly, the active material (Fe<sub>2</sub>O<sub>3</sub>/CF@Gs, Fe<sub>2</sub>O<sub>3</sub>/CF, Fe<sub>2</sub>O<sub>3</sub> or NiO/CF@Gs, NiO/CF, NiO or CF), graphene, acetylene black and PVDF were mixed within NMP solvent according to the ink ratio above. Then, the mixed suspensions were dropped on the surface of foamed nickel and dried at 70 °C for 4 hours. Finally, the dried foamed nickel was pressed on 10 MPa for 30 seconds. The loading mass of active materials during the prepared working electrode was at approximate 2 mg/cm<sup>2</sup>.

For two electrodes test, the printed NiO/CF@Gs electrode as the positive and Fe<sub>2</sub>O<sub>3</sub>/CF@Gs served as negative electrode. The cycling stability is tested by CT3001A battery test system.

The areal capacitance was computed by CV or GCD curves through Equation S1 and Equation S2:

$$C_S = \frac{1}{2 \times S \times v \times \Delta U} \int IdU \quad (1)$$

where  $v$  is scan rate (mV s<sup>-1</sup>),  $S$  is area of supercapacitor, and  $\Delta U$  is potential window.

$$C_S = \frac{I \times \Delta t}{S \times \Delta U} \quad (2)$$

where  $I$  is discharge current density,  $\Delta t$  is the discharge time,  $\Delta U$  is the effective potential window,  $S$  is the effective active areal.

The energy density ( $E$ ) and power density ( $P$ ) could be calculated based on Equation S3 and Equation S4:

$$E = \frac{1}{2} C_S \times \Delta U^2 \quad (3)$$

$$P = \frac{E}{\Delta t} \quad (4)$$

where  $\Delta U$  is the operational potential window (V),  $C_S$  is the areal capacitance, and  $\Delta t$  is the discharged time.

The capacitance of electrodes is calculated by CV curves based on the following Equation S5:

$$C_m = \frac{1}{2 \times m \times v \times \Delta U} \int IdU \quad (5)$$

where  $m$  is mass of active materials,  $\Delta U$  is potential window, and  $v$  is scan rate (mV s<sup>-1</sup>).

### ***Material Characterization***

The surface morphology and energy-dispersive X-ray (EDX) mapping were collected on a field-emission scanning electron microscopy (FE-SEM, TESCAN MIRA 3). The inner morphology and structure were characterized by the transmission electronic microscope (TEM, FEI Tecnai F20) operated at 200 kV. The crystal structures were measured by X-ray diffraction (XRD, Rigaku Miniflex 600) with Cu-K $\alpha$  radiation ( $\lambda = 0.15418$  nm). Raman spectroscopy was determined by commercial

Raman microscope (Horiba JY HR Evolution, France) with laser excited at 532 nm. The surface chemical states were investigated by X-ray photoelectron spectroscopy (XPS, Thermo Scientific K-Alpha) with Al  $K_{\alpha}$  radiation (1486.6 eV), and the peak position was internally referenced to the C1s peak at 284.8 eV. Surface area and average pore diameter were obtained by nitrogen adsorption and desorption isotherm at 77 K by JW-BK200C analyzer. The rheological properties of inks are tested by a rheometer (HAAKE MARS60).

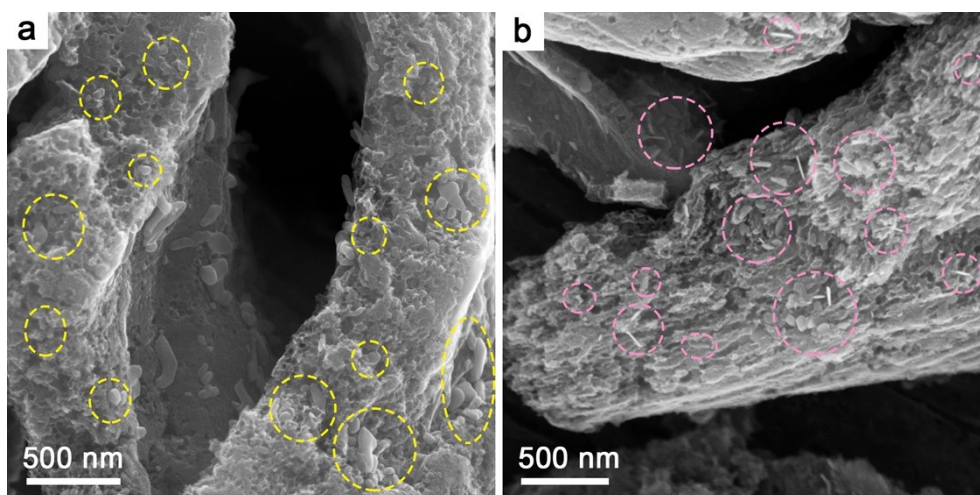

**Figure S1.** SEM images of metal-oxide and porous carbon fiber (CF) composite samples.

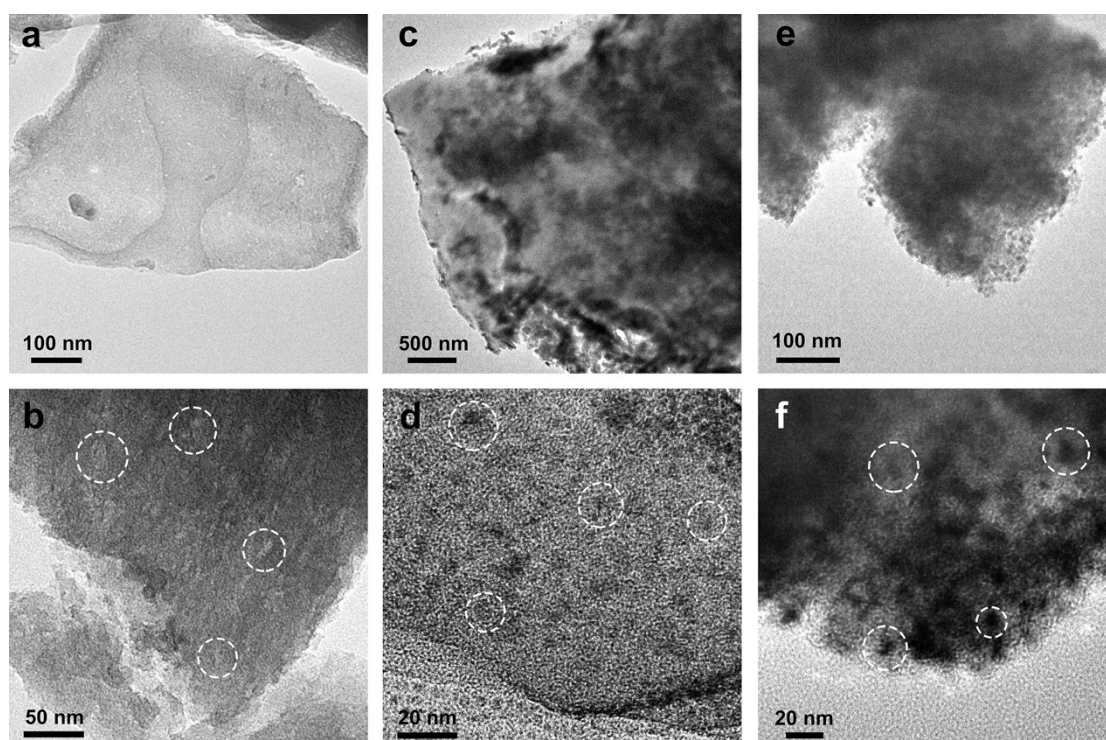

**Figure S2.** TEM images of (a, b) CF, (c, d)  $\text{Fe}_2\text{O}_3/\text{CF}$  and (e, f)  $\text{NiO}/\text{CF}$  composite samples.

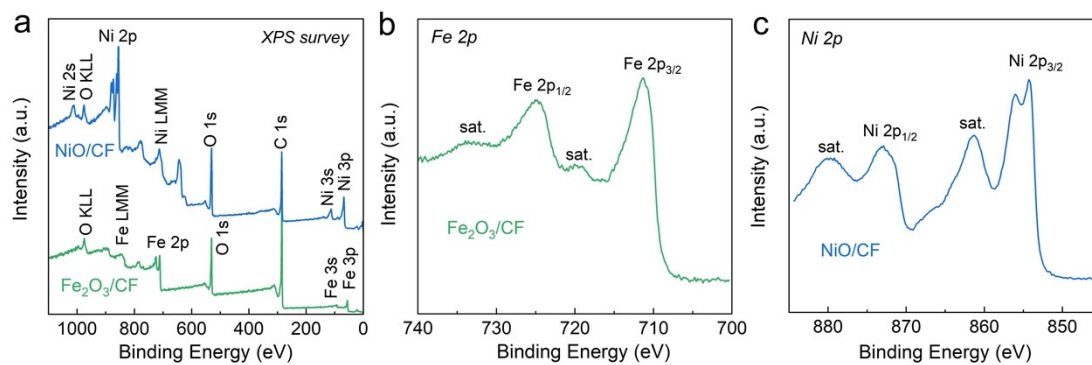

**Figure S3.** (a) The XPS survey spectra of  $\text{Fe}_2\text{O}_3/\text{CF}$  and  $\text{NiO}/\text{CF}$  samples. (b) XPS Fe 2p spectrum of  $\text{Fe}_2\text{O}_3/\text{CF}$ . (c) XPS Ni 2p spectrum of  $\text{NiO}/\text{CF}$ .

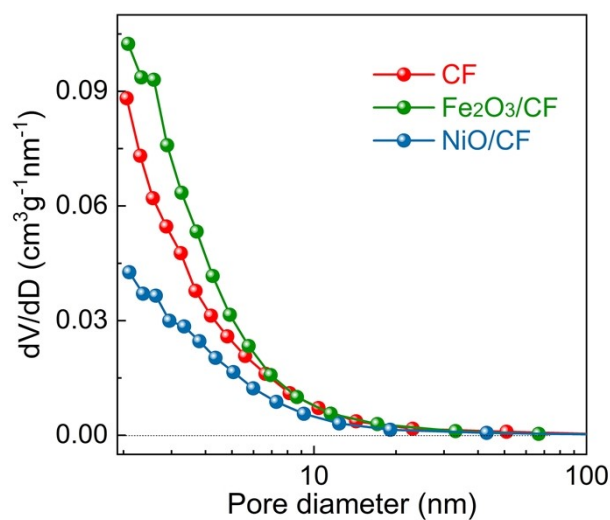

**Figure S4.** The mesoporous size (> 2 nm) distribution of  $\text{CF}$ ,  $\text{Fe}_2\text{O}_3/\text{CF}$  and  $\text{NiO}/\text{CF}$  samples.



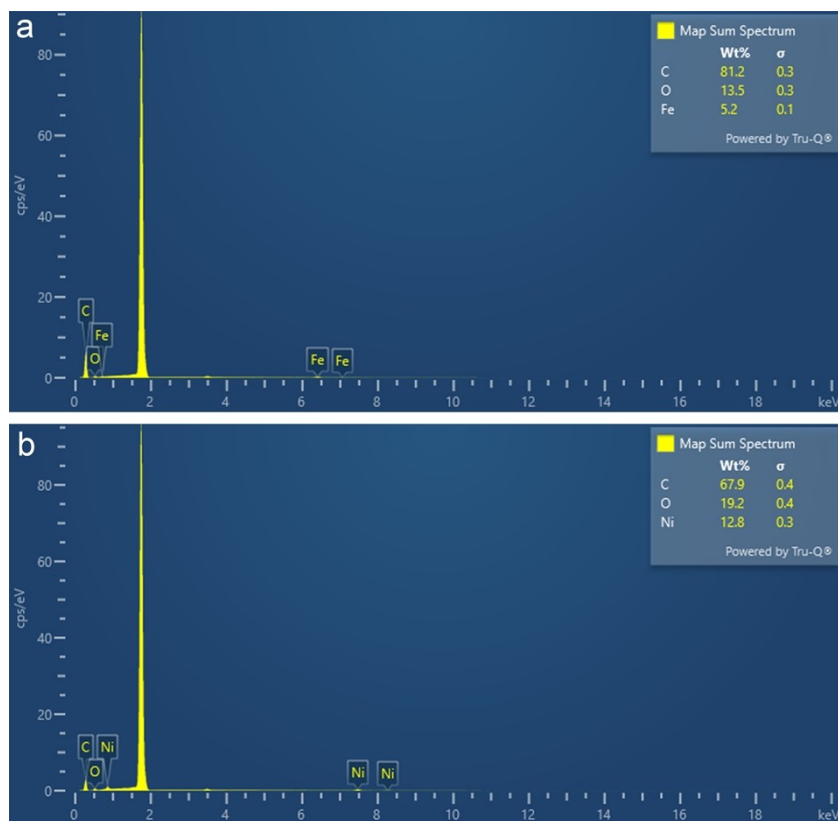

**Figure S5.** EDX spectra with quantitative atomic analysis of (a) Fe<sub>2</sub>O<sub>3</sub>/CF and (b) NiO/CF samples.

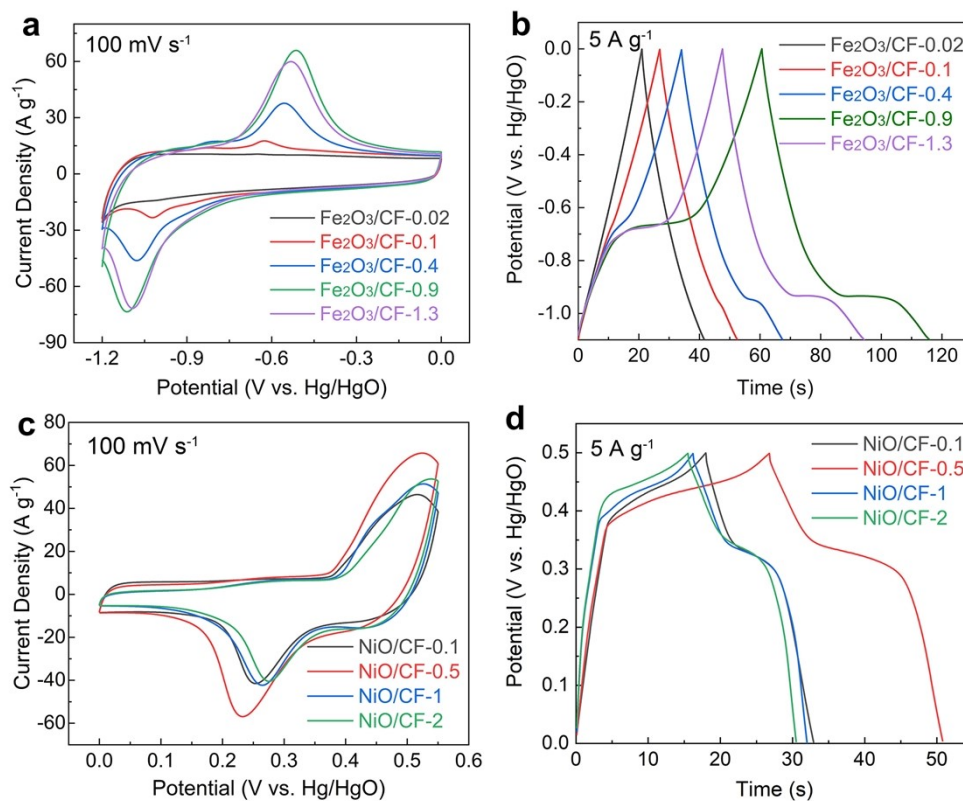

**Figure S6.** (a) CV curves of Fe<sub>2</sub>O<sub>3</sub>/CF-*x* at 100 mV s<sup>-1</sup>. (b) GCD curves of Fe<sub>2</sub>O<sub>3</sub>/CF-*x* at 5 A g<sup>-1</sup>. *x* denotes the concentration of Fe(NO<sub>3</sub>)<sub>3</sub>·9H<sub>2</sub>O solution from 0.02~1.3 g mL<sup>-1</sup>. (c) CV curves of NiO/CF-*y* at 100 mV s<sup>-1</sup>. (d) GCD curves of NiO/CF-*y* at 5 A g<sup>-1</sup>. *y* denotes the concentration of Ni(NO<sub>3</sub>)<sub>2</sub>·6H<sub>2</sub>O solution from 0.1~2 g mL<sup>-1</sup>.

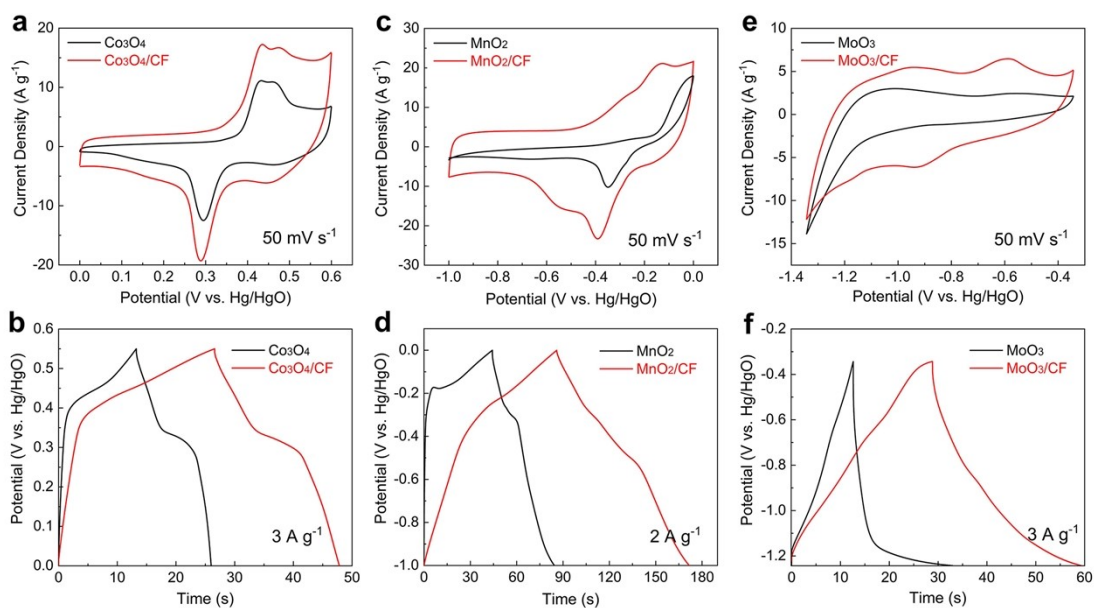

**Figure S7.** (a) CV curves and (b) GCD curves of  $\text{Co}_3\text{O}_4$  and  $\text{Co}_3\text{O}_4/\text{CF}$  samples. (c) CV curves and (b) GCD curves of  $\text{MnO}_2$  and  $\text{MnO}_2/\text{CF}$  samples. (e) CV curves and (b) GCD curves of  $\text{MoO}_3$  and  $\text{MoO}_3/\text{CF}$  samples.

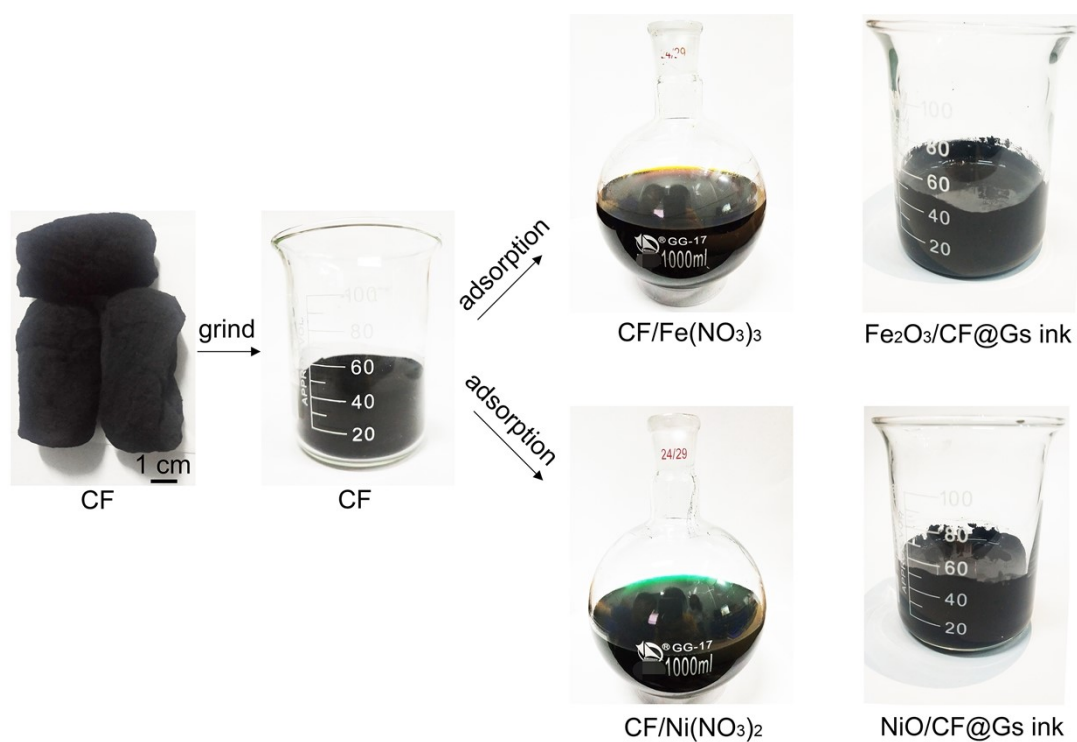

**Figure S8.** The large-scale fabrication of  $\text{Fe}_2\text{O}_3/\text{CF}@Gs$  and  $\text{NiO}/\text{CF}@Gs$  based inks.

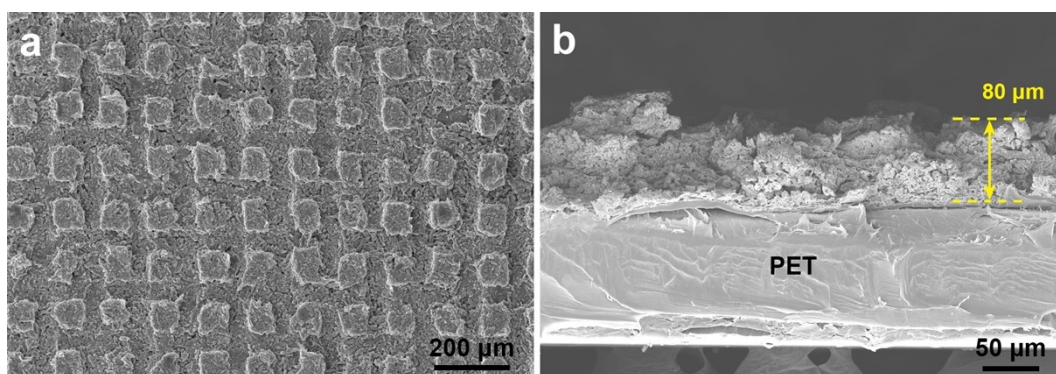

**Figure S9.** (a) Top-view and (b) side-view SEM images of screen-printed multi-conductive electrodes on PET substrates.

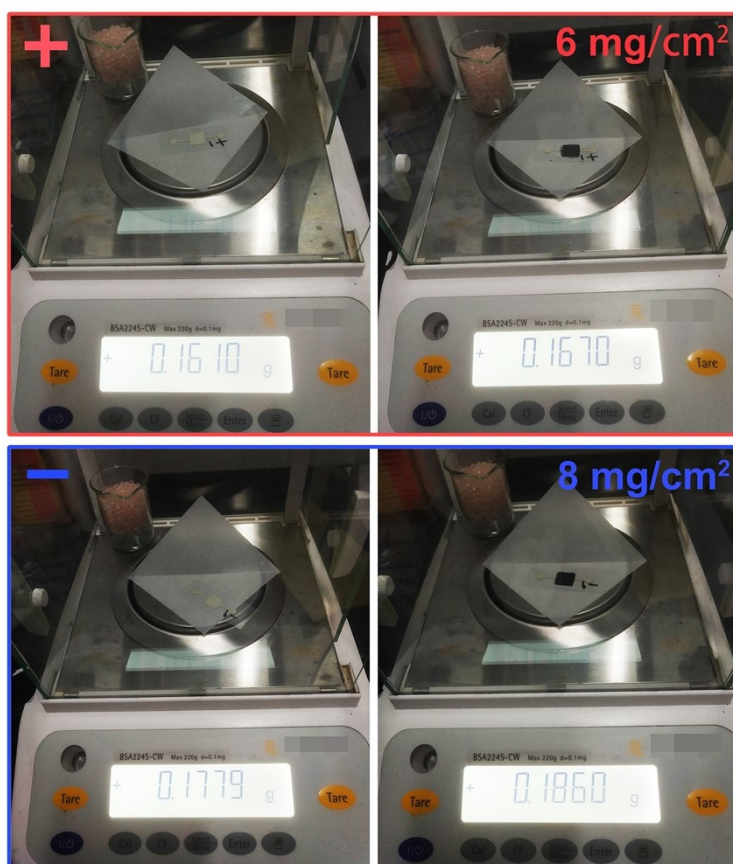

**Figure S10.** The weight of screen-printed positive and negative electrodes on PET substrates.

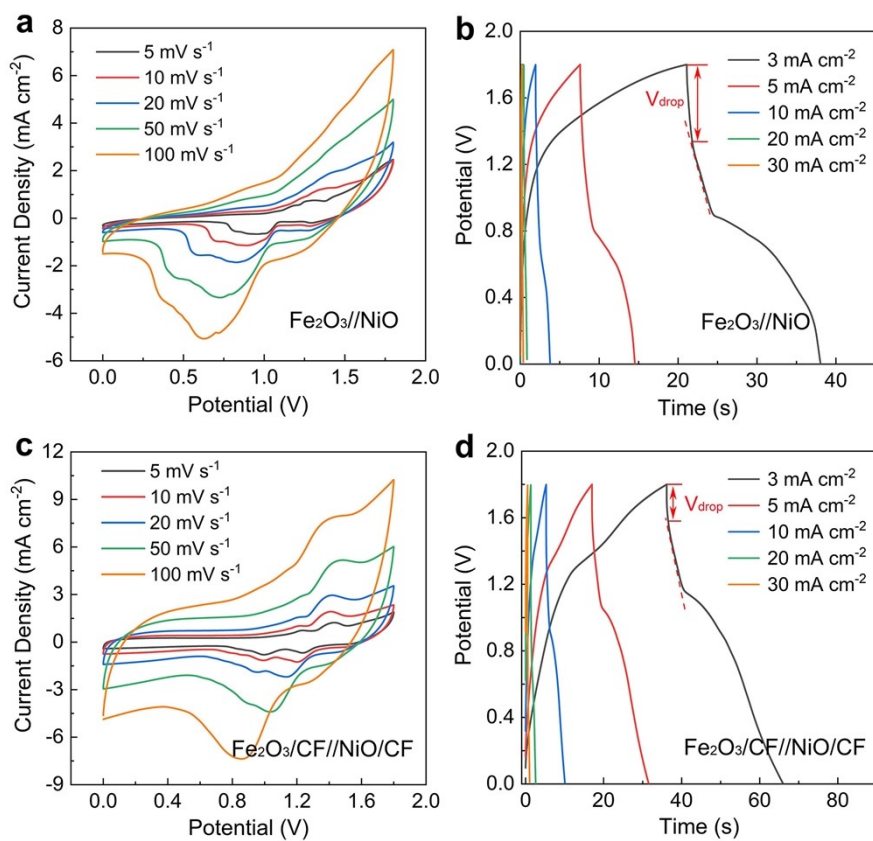

**Figure S11.** (a) CV and (b) GCD curves of  $\text{Fe}_2\text{O}_3/\text{NiO}$  based supercapacitors at different scan rates and current densities. (c) CV and (d) GCD curves of  $\text{Fe}_2\text{O}_3/\text{CF}/\text{NiO}/\text{CF}$  based supercapacitors at different scan rates and current densities.

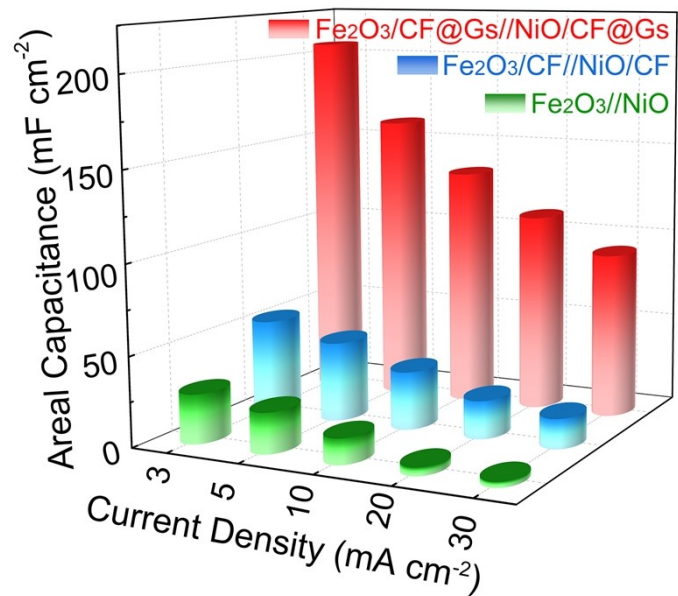

**Figure S12.** Areal capacitances of the Fe<sub>2</sub>O<sub>3</sub>//NiO, Fe<sub>2</sub>O<sub>3</sub>/CF//NiO/CF and Fe<sub>2</sub>O<sub>3</sub>/CF@Gs//NiO/CF@Gs supercapacitors at different current densities.



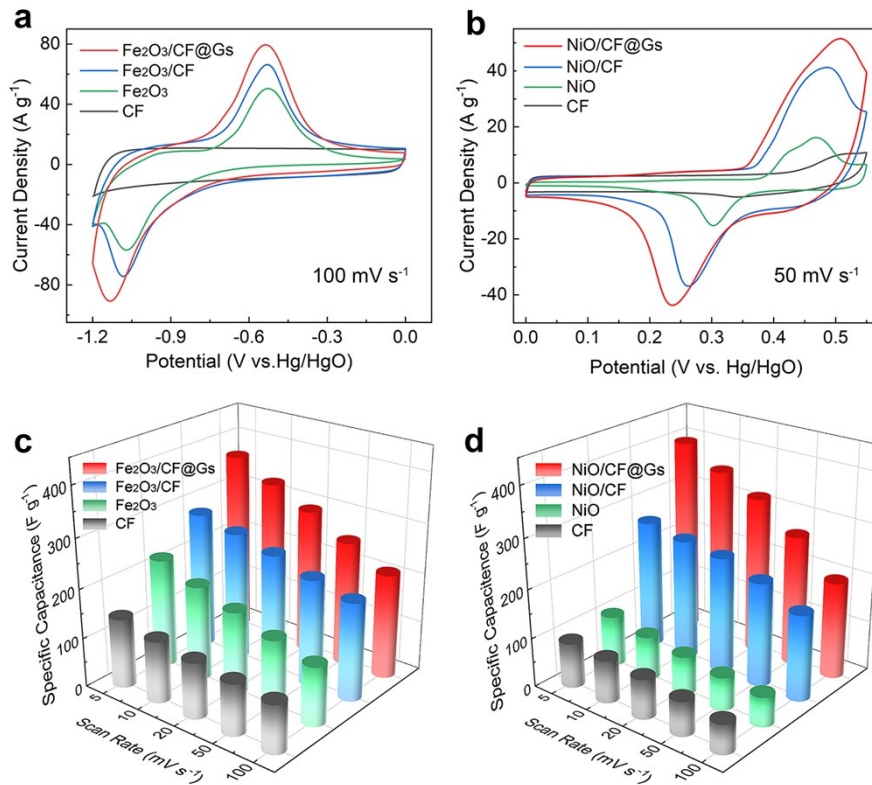

**Figure S13.** (a) CV curves of CF, Fe<sub>2</sub>O<sub>3</sub>, Fe<sub>2</sub>O<sub>3</sub>/CF, and Fe<sub>2</sub>O<sub>3</sub>/CF@Gs negative electrodes at different scan rates. (b) CV curves of CF, NiO, NiO/CF, and NiO/CF@Gs positive electrodes at different scan rates. (c) Specific capacitance of negative electrodes and (d) positive electrodes at various scan rates. Both positive and negative electrodes are with active material loading of about 2 mg on foamed nickel, details see Experimental Section.

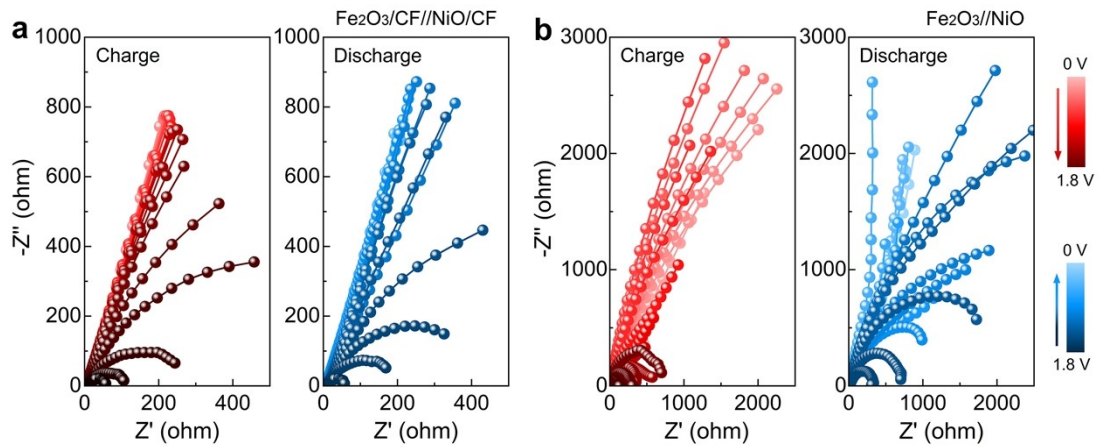

**Figure S14.** In-situ Nyquist plots of (a) Fe<sub>2</sub>O<sub>3</sub>/CF//NiO/CF and (b) Fe<sub>2</sub>O<sub>3</sub>//NiO based asymmetric supercapacitor at various states in charging and discharging stage.

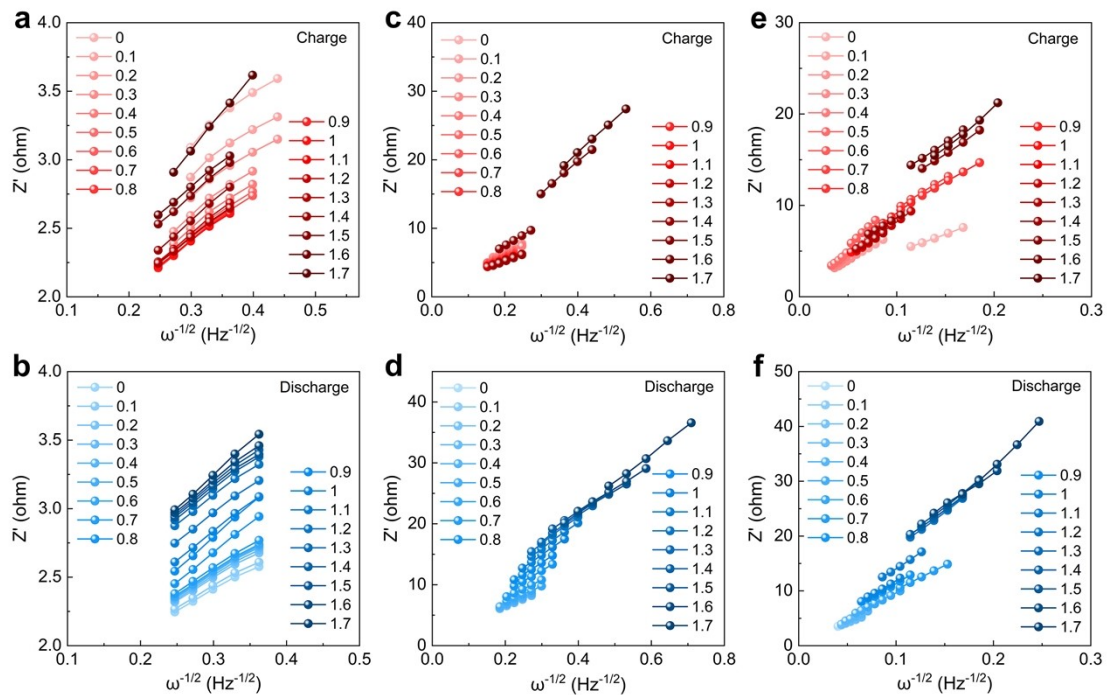

**Figure S15.** Real part of impedance versus  $\omega^{-1/2}$  during charging and discharging stage for (a, b) Fe<sub>2</sub>O<sub>3</sub>/CF@Gs//NiO/CF@Gs, (c, d) Fe<sub>2</sub>O<sub>3</sub>/CF//NiO/CF and (e, f) Fe<sub>2</sub>O<sub>3</sub>//NiO based supercapacitors. The slopes determine the diffusion coefficient of ion.



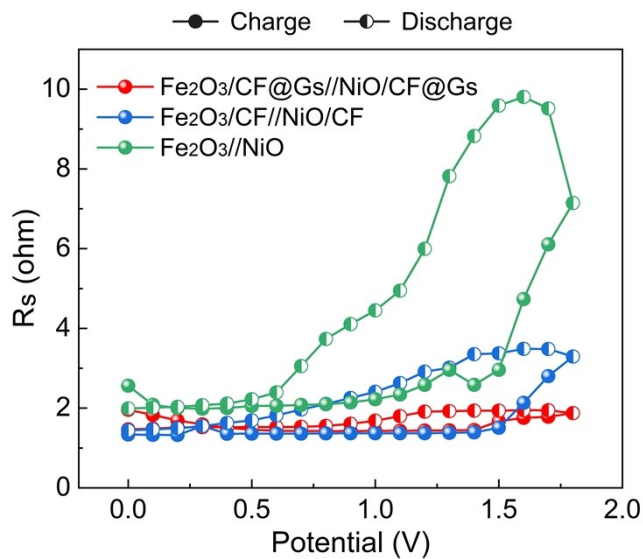

**Figure S16.** The equivalent series resistance ( $R_s$ ) as a function of state during charging and discharging process for the  $\text{Fe}_2\text{O}_3//\text{NiO}$ ,  $\text{Fe}_2\text{O}_3/\text{CF}//\text{NiO}/\text{CF}$ , and  $\text{Fe}_2\text{O}_3/\text{CF}@Gs//\text{NiO}/\text{CF}@Gs$  supercapacitors.

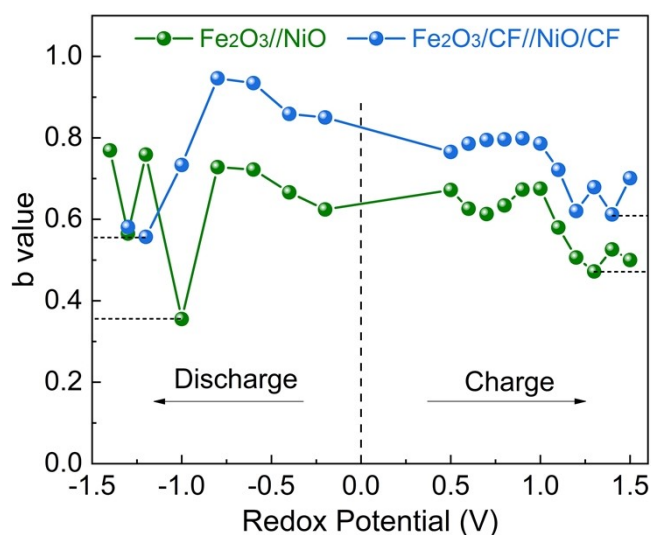

**Figure S17.** The  $b$ -values of  $\text{Fe}_2\text{O}_3//\text{NiO}$  and  $\text{Fe}_2\text{O}_3/\text{CF}//\text{NiO}/\text{CF}$  based asymmetric supercapacitors at anodic scans (charge) and cathodic scans (discharge).

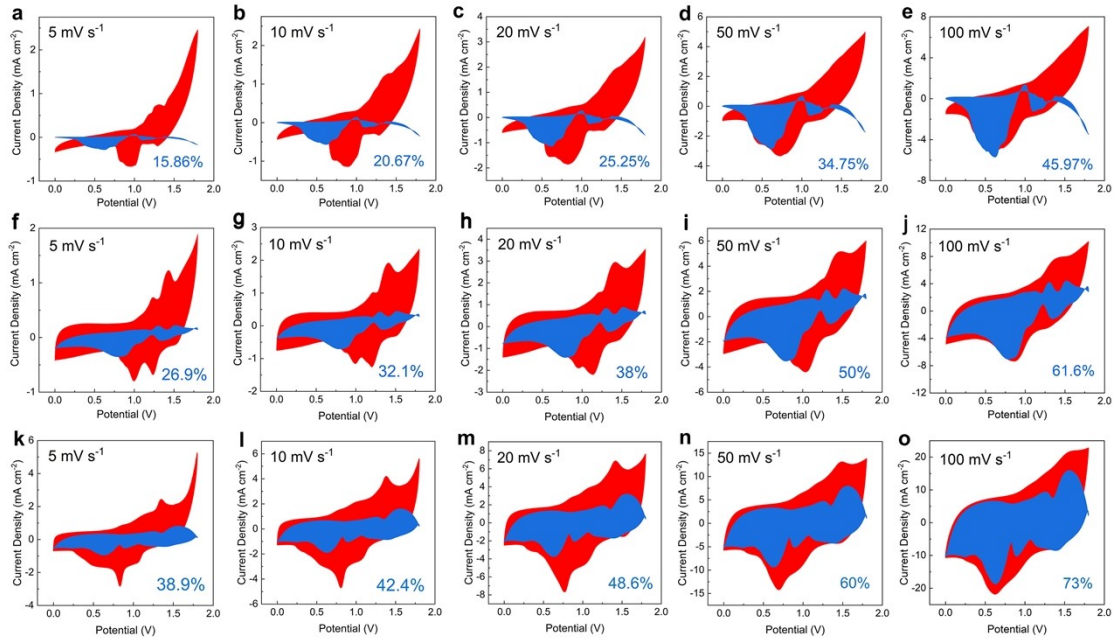

**Figure S18.** Separation of the surface and diffusion currents in (a-e) Fe<sub>2</sub>O<sub>3</sub>//NiO, (f-j) Fe<sub>2</sub>O<sub>3</sub>/CF//NiO/CF, and (k-o) Fe<sub>2</sub>O<sub>3</sub>/CF@Gs//NiO/CF@Gs based supercapacitors at various scan rates.

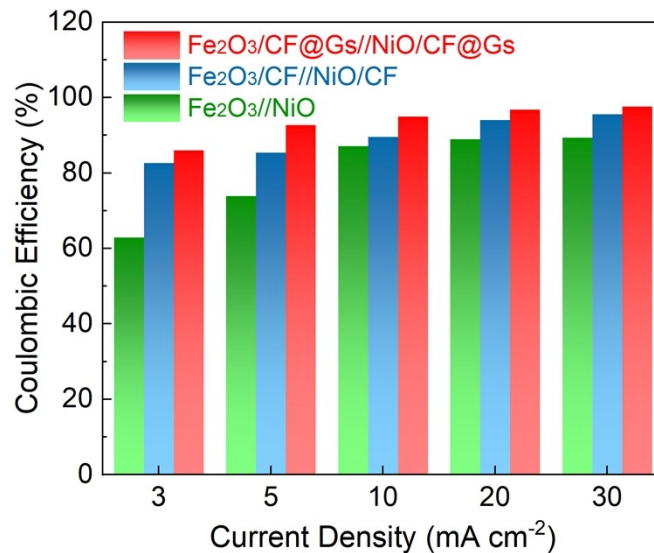

**Figure S19.** Coulombic efficiency of Fe<sub>2</sub>O<sub>3</sub>//NiO, Fe<sub>2</sub>O<sub>3</sub>/CF//NiO/CF and Fe<sub>2</sub>O<sub>3</sub>/CF@Gs//NiO/CF@Gs based supercapacitor at different current densities.

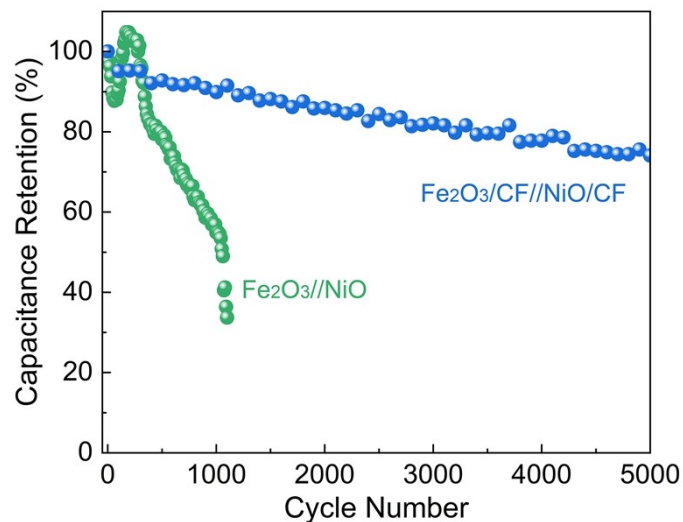

**Figure S20.** Capacitance retention of  $\text{Fe}_2\text{O}_3//\text{NiO}$  and  $\text{Fe}_2\text{O}_3/\text{CF}//\text{NiO}/\text{CF}$  based supercapacitor at the current density of  $10 \text{ mA cm}^{-2}$ .

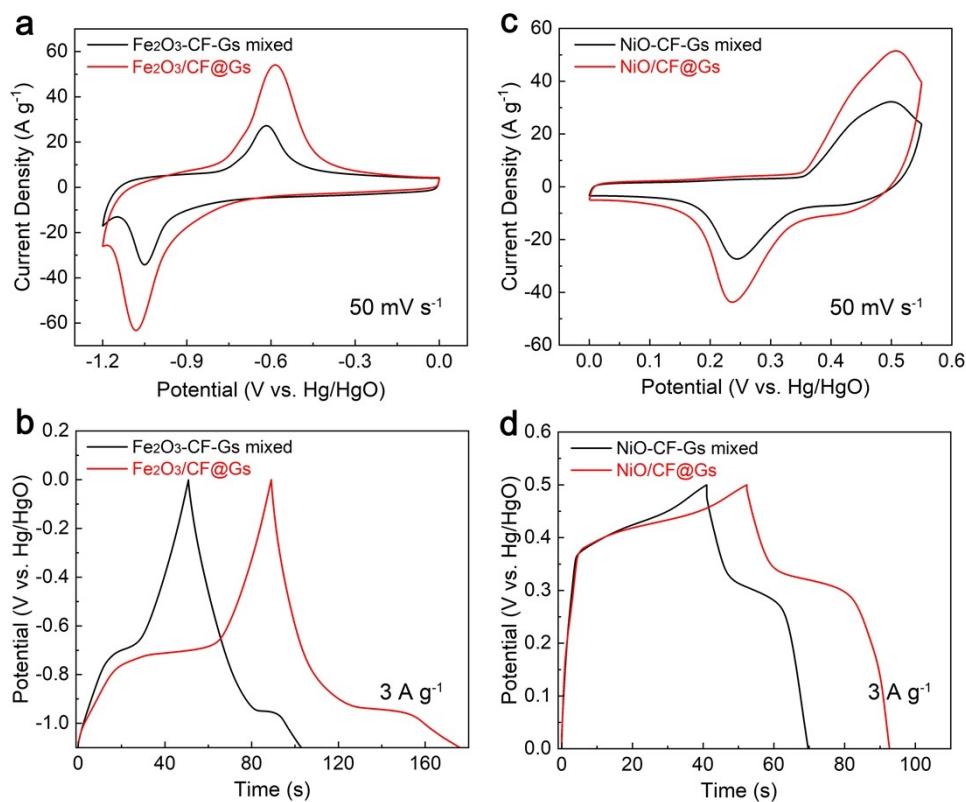

**Figure S21.** (a) CV and (b) GCD curves of  $\text{Fe}_2\text{O}_3/\text{CF}@Gs$  and simple physical mixed negative electrode ( $\text{Fe}_2\text{O}_3\text{-CF-Gs}$ ). (c) CV and (d) GCD curves of  $\text{NiO}/\text{CF}@Gs$  and simple physical mixed positive electrode ( $\text{NiO-CF-Gs}$ ).

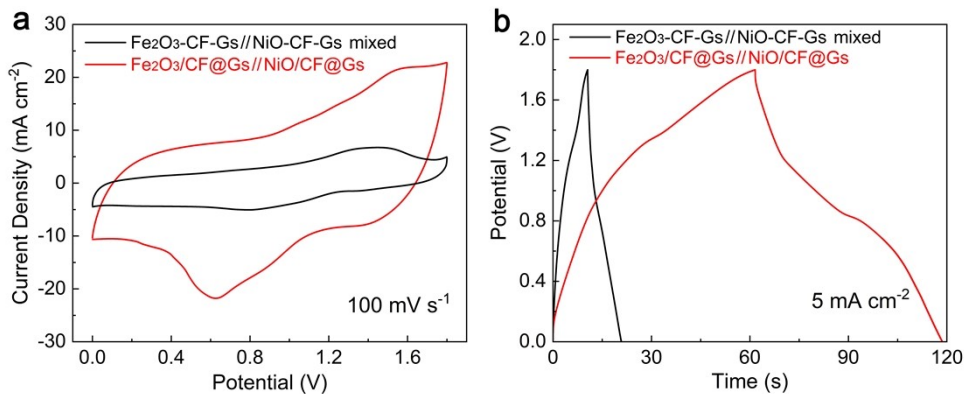

**Figure S22.** (a) CV curves and (b) GCD curves of Fe<sub>2</sub>O<sub>3</sub>/CF@Gs//NiO/CF@Gs and Fe<sub>2</sub>O<sub>3</sub>-CF-Gs//NiO-CF-Gs based asymmetric supercapacitors.

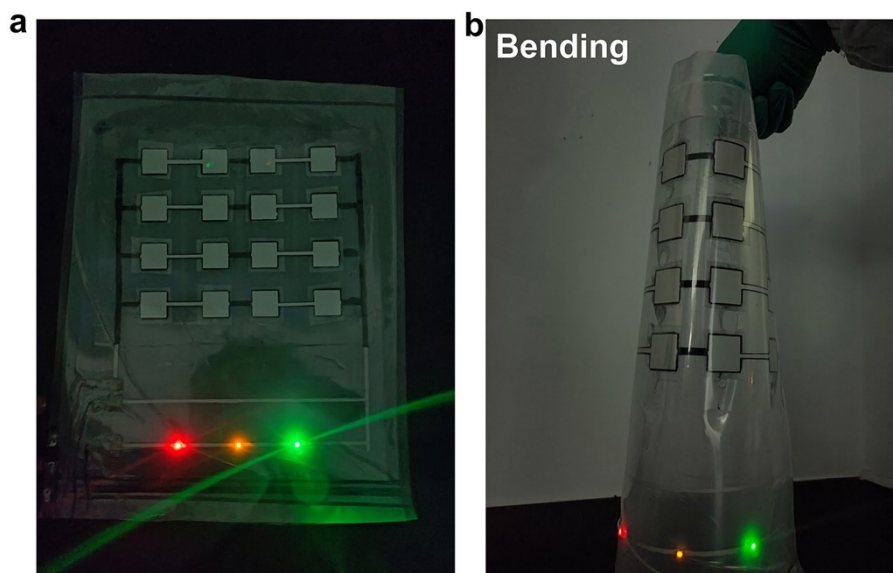

**Figure S23.** (a) The screen-printed 4×4 integrated Fe<sub>2</sub>O<sub>3</sub>/CF@Gs//NiO/CF@Gs based flexible supercapacitors and (b) under bending state to light up a 5.9 V LEDs array (1.8 V for red LED, 1.8 V for yellow LED, and 2.3 V for green LED).

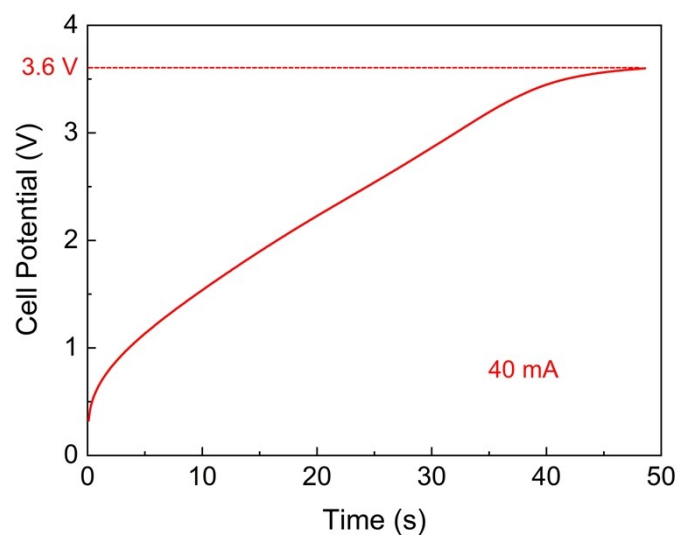

**Figure S24.** Constant-current charge curve of two  $\text{Fe}_2\text{O}_3/\text{CF}@\text{Gs}/\text{NiO}/\text{CF}@\text{Gs}$  based supercapacitors connected in series at 40 mA, and then power for the electronic timer.

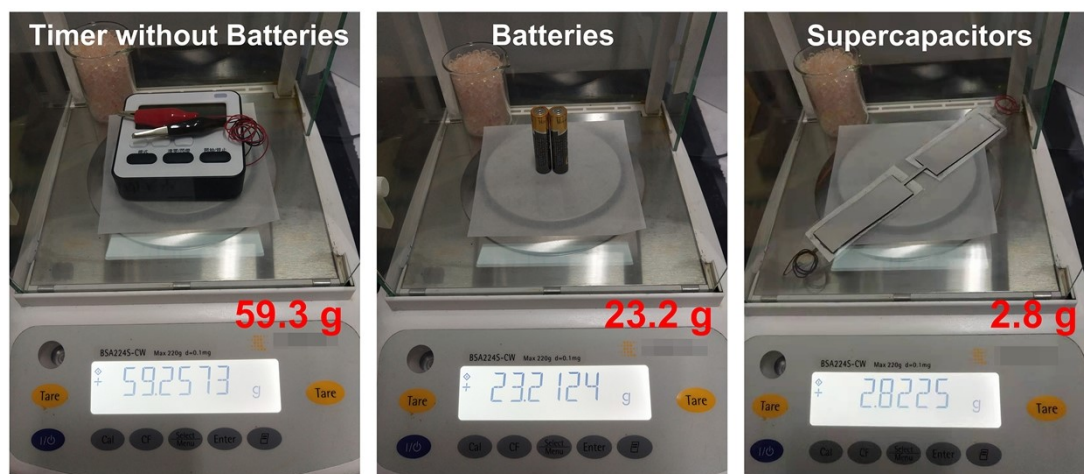

**Figure S25.** The weight of electronic timer without batteries, two batteries, and the printed supercapacitors.

**Table S1.** Adsorption parameters of different samples calculated from N<sub>2</sub> adsorption isotherms.

| Sample                             | SSA<br>(m <sup>2</sup> g <sup>-1</sup> ) <sup>a</sup> | Total pore<br>volume<br>(cm <sup>3</sup> g <sup>-1</sup> ) <sup>b</sup> | Micropor<br>e volume<br>(cm <sup>3</sup> g <sup>-1</sup> ) <sup>c</sup> | V <sub>micro</sub> /V <sub>total</sub> | Mesopore<br>volume<br>(cm <sup>3</sup> g <sup>-1</sup> ) <sup>d</sup> | V <sub>meso</sub> /V <sub>total</sub> | Pore<br>diameter<br>(nm) <sup>e</sup> |
|------------------------------------|-------------------------------------------------------|-------------------------------------------------------------------------|-------------------------------------------------------------------------|----------------------------------------|-----------------------------------------------------------------------|---------------------------------------|---------------------------------------|
| CF                                 | 863.7                                                 | 0.67                                                                    | 0.33                                                                    | 49.3%                                  | 0.34                                                                  | 50.7%                                 | 2.056                                 |
| Fe <sub>2</sub> O <sub>3</sub> /CF | 544.7                                                 | 0.49                                                                    | 0.12                                                                    | 24.5%                                  | 0.37                                                                  | 75.5%                                 | 2.585                                 |
| NiO/CF                             | 526.5                                                 | 0.42                                                                    | 0.19                                                                    | 45.2%                                  | 0.23                                                                  | 54.8%                                 | 2.63                                  |

<sup>a</sup>Specific surface area is calculated from the BET equation. <sup>b</sup>Total pore volume, <sup>c</sup>micropore volume (<2 nm), and <sup>d</sup>mesopore volume (>2 nm) calculated by Density Functional Theory (DFT). <sup>e</sup>Pore diameter (nm, most probable pore diameter) calculated by using the Nonlinear Density Functional Theory (NLDFT).

**Table S2.** The performance of Fe<sub>2</sub>O<sub>3</sub>/CF@Gs//NiO/CF@Gs based aqueous flexible supercapacitor compared with other recent reported flexible supercapacitors.

| Type of supercapacitor                                                        | Electrolyte                          | Potential range (V) | Areal capacitance (mF cm <sup>-2</sup> )                    | Energy density (mW h cm <sup>-2</sup> ) | Power density (mW cm <sup>-2</sup> ) | Reference        |
|-------------------------------------------------------------------------------|--------------------------------------|---------------------|-------------------------------------------------------------|-----------------------------------------|--------------------------------------|------------------|
| <i>Fe<sub>2</sub>O<sub>3</sub>/CF@Gs // NiO/CF@Gs*</i>                        | <b>KOH/PVA</b>                       | <b>0-1.8</b>        | <b>206.2 mF cm<sup>-2</sup><br/>at 3 mA cm<sup>-2</sup></b> | <b>0.0930</b>                           | <b>30</b>                            | <b>This work</b> |
| TSBL-MQD/LRGO                                                                 | H <sub>2</sub> SO <sub>4</sub> /PVA  | 0-1.2               | 10.4 mF cm <sup>-2</sup><br>at 0.6 mA cm <sup>-2</sup>      | 0.0020                                  | 0.13                                 | 4                |
| MnO <sub>2</sub> @C // VN*                                                    | MgSO <sub>4</sub> /PAM               | 0-2.2               | 28.5 mF cm <sup>-2</sup><br>at 0.5 mA cm <sup>-2</sup>      | 0.0190                                  | 23                                   | 5                |
| CoNiP@NiOOH // ZIF-C*                                                         | KOH/PVA                              | 0-1.4               | 54.7 mF cm <sup>-2</sup><br>at 0.5 mA cm <sup>-2</sup>      | 0.0140                                  | 6                                    | 6                |
| p-Mn <sub>3</sub> O <sub>4</sub> @C*                                          | Na <sub>2</sub> SO <sub>4</sub> /CMC | 0-1.3               | 30.1 mF cm <sup>-2</sup><br>at 0.2 mA cm <sup>-2</sup>      | 0.0071                                  | 1.3                                  | 7                |
| VO <sub>x</sub> /rGO // G-VNQDs/rGO*                                          | LiCl/PVA                             | 0-1.6               | 207.9 mF cm <sup>-2</sup><br>at 0.63 mA cm <sup>-2</sup>    | 0.0740                                  | 3.8                                  | 8                |
| MoO <sub>x</sub> //MoO <sub>x</sub>                                           | Sodium alginate<br>(Alg-Na)          | 0-1.0               | 112.5 mF cm <sup>-2</sup><br>at 1 mA cm <sup>-2</sup>       | 0.0160                                  | 2.53                                 | 9                |
| Ex-Ti <sub>3</sub> C <sub>2</sub> T <sub>x</sub> //MoS <sub>3-x</sub> @3DnCF* | H <sub>2</sub> SO <sub>4</sub> /PVA  | 0-1.6               | 160 mF cm <sup>-2</sup><br>at 0.25 mA cm <sup>-2</sup>      | 0.0570                                  | 10                                   | 10               |
| MnHCF-MnO <sub>x</sub> /ErGO*                                                 | LiCl/PVA                             | 0-1                 | 16.8 mF cm <sup>-2</sup><br>at 0.1 mA cm <sup>-2</sup>      | 0.0023                                  | 0.5                                  | 11               |
| MoS <sub>2</sub> /rGO//CNT*                                                   | H <sub>2</sub> SO <sub>4</sub> /PVA  | 0-1                 | 13.7 mF cm <sup>-2</sup><br>at 0.1 mA cm <sup>-2</sup>      | 0.0019                                  | 1                                    | 12               |
| W <sub>18</sub> O <sub>49</sub> NWs/rGO                                       | AlCl <sub>3</sub>                    | 0-1.1               | 48 mF cm <sup>-2</sup><br>at 2 mA cm <sup>-2</sup>          | 0.0052                                  | 2.2                                  | 13               |
| MgO@G//MgO@G*                                                                 | KOH/PVA                              | 0-1.4               | 21.7 mF cm <sup>-2</sup><br>at 0.5 mA cm <sup>-2</sup>      | 0.0059                                  | 6                                    | 14               |

Annotation: \* denotes all-printed flexible supercapacitors.

## Reference

- [1] Y. Feng, L. Liu, J. Liang, W. Yao, B. Tian, C. Jiang, W. Wu, *J. Power Sources* 2019, **433**, 126676.
- [2] Q. Lu, L. Liu, S. Yang, J. Liu, Q. Tian, W. Yao, Q. Xue, M. Li, W. Wu, *J. Power Sources* 2017, **361**, 31-38.
- [3] J. Liang, Y. Feng, L. Liu, S. Q. Li, C. Z. Jiang, W. Wu, *J. Mater. Chem. A* 2019, **7**, 15960-15968.
- [4] Y. Yuan, L. Jiang, X. Li, P. Zuo, X. Zhang, Y. Lian, Y. Ma, M. Liang, Y. Zhao, L. Qu, *Adv. Mater.* 2022, **34**, e2110013.
- [5] Z. Tian, X. Tong, G. Sheng, Y. Shao, L. Yu, V. Tung, J. Sun, R. B. Kaner, Z. Liu, *Nat. Commun.* 2019, **10**, 4913.
- [6] M. Qiu, P. Sun, G. Cui, Y. Tong, W. Mai, *ACS Nano* 2019, **13**, 8246-8255.
- [7] Z. Peng, J. Huang, Q. He, L. Tan, Y. Chen, *J. Mater. Chem. A* 2021, **9**, 4273-4280.
- [8] K. Shen, J. Ding, S. Yang, *Adv. Energy Mater.* 2018, **8**, 1800408.
- [9] H. Sheng, J. Zhou, B. Li, Y. He, X. Zhang, J. Liang, J. Zhou, Q. Su, E. Xie, W. Lan, K. Wang, C. Yu, *Sci. Adv.* 2021, **7**, eabe3097.
- [10] K. Ghosh, M. Pumera, *Small Methods* 2021, **5**, e2100451.
- [11] J. Liang, B. Tian, S. Li, C. Jiang, W. Wu, *Adv. Energy Mater.* 2020, **10**, 2000022.
- [12] W. Yang, L. He, X. Tian, M. Yan, H. Yuan, X. Liao, J. Meng, Z. Hao, L. Mai, *Small* 2017, **13**, 1700639.
- [13] M. Hassan, G. Abbas, Y. Lu, Z. Wang, Z. Peng, *J. Mater. Chem. A* 2022, **10**, 4870-4880.
- [14] F. Li, J. Qu, Y. Li, J. Wang, M. Zhu, L. Liu, J. Ge, S. Duan, T. Li, V. K. Bandari,



M. Huang, F. Zhu, O. G. Schmidt, *Adv. Sci.* 2020, **7**, 2001561.
